# Supplementary material for: Stannyl ceramides as efficient acceptors for synthesising β-galactosyl ceramides
Source: Royal Society of Chemistry journal article supplement (doi:10.1039/b809570a), 2008-01-01

## **Supporting Information**

### **Stannyl Ceramides as Efficient Acceptors for Synthesising $\beta$ -Galactosyl Ceramides**

José Antonio Morales-Serna, Yolanda Díaz, M. Isabel Matheu and Sergio Castellón\*

$^1\text{H}$  and  $^{13}\text{C}$  NMR of compounds **10**, **16**, **17** and **18**.

<sup>1</sup>H NMR of 10

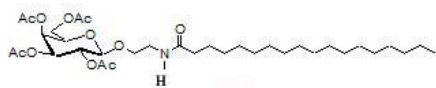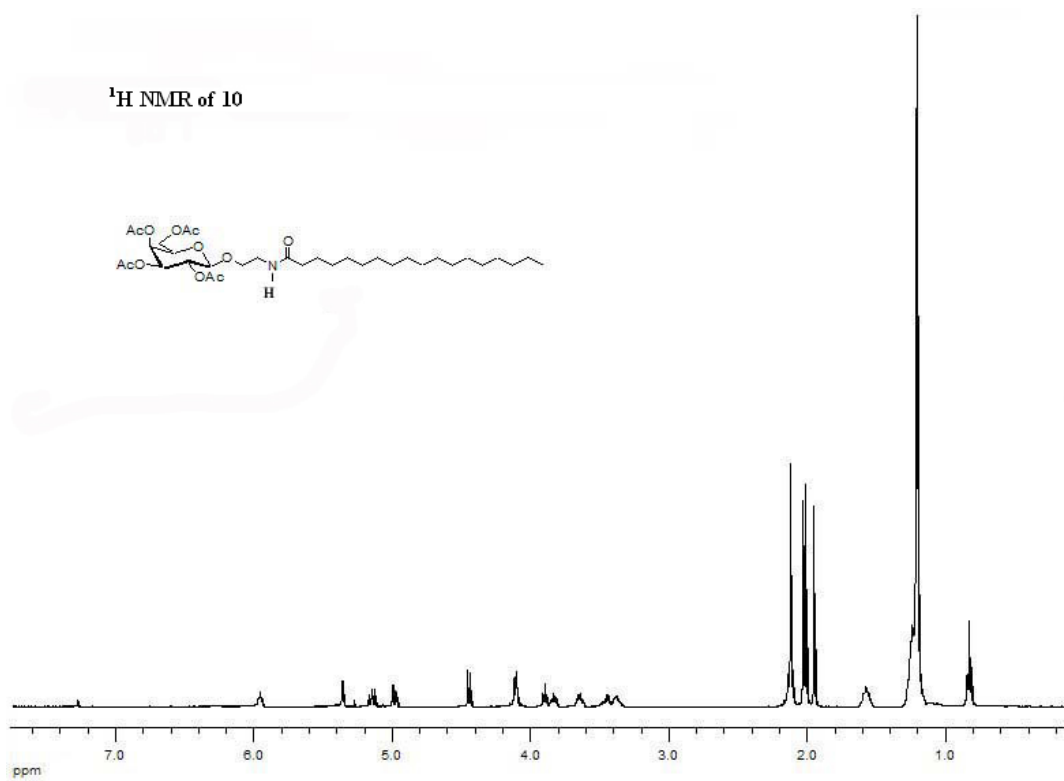

<sup>13</sup>C NMR of 10

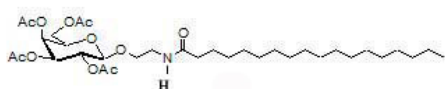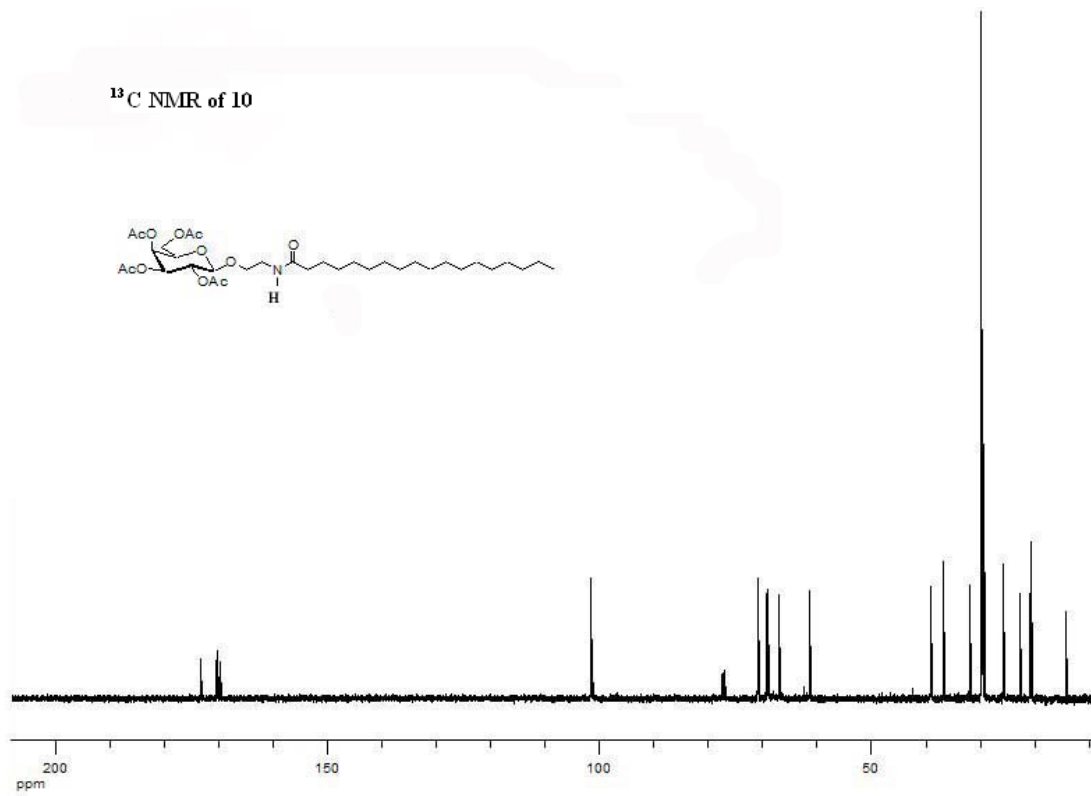

<sup>1</sup>H NMR of 16

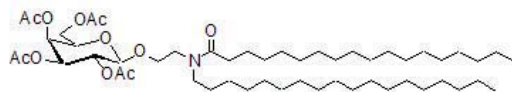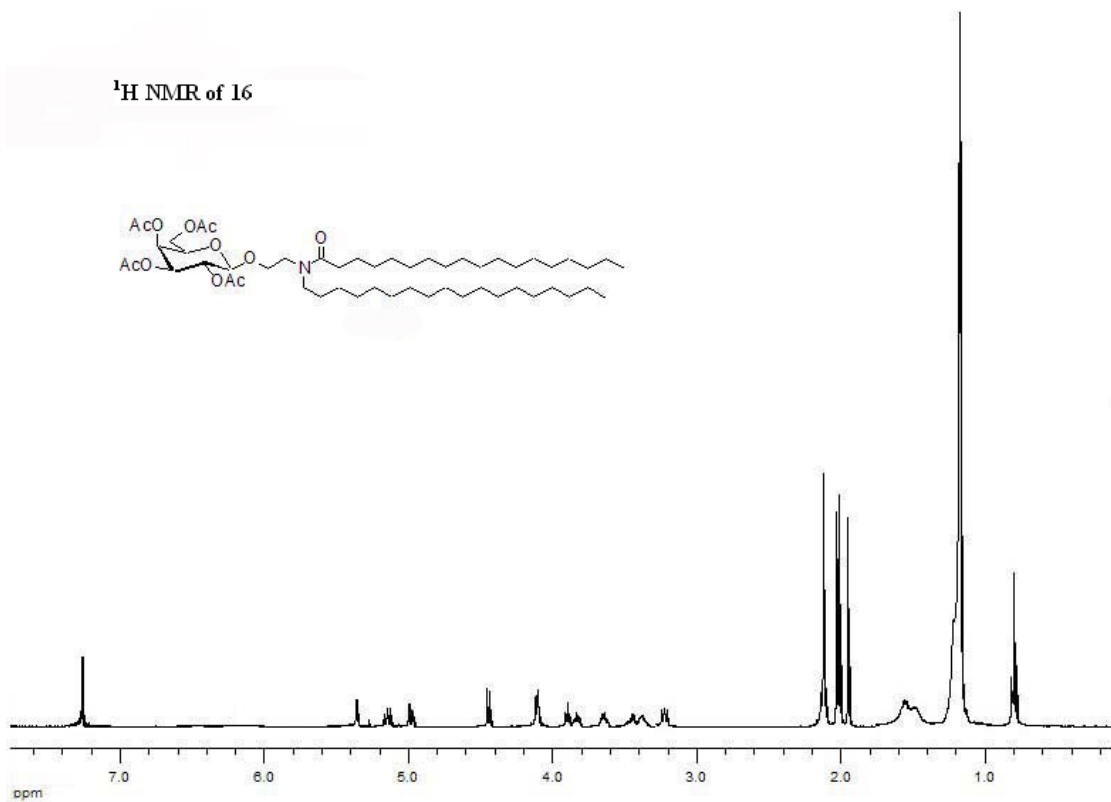

<sup>13</sup>C NMR of 16

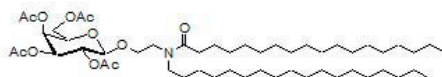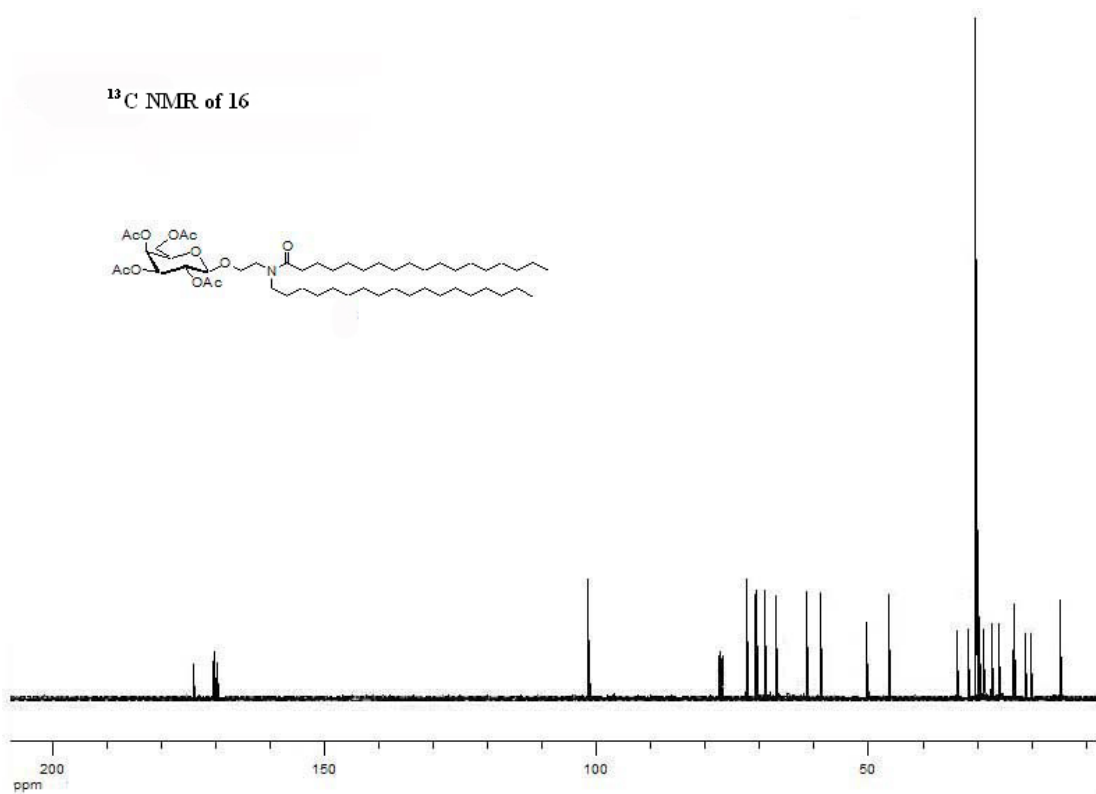

<sup>1</sup>H NMR of 17

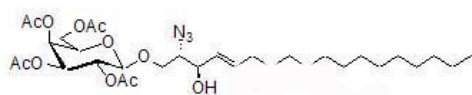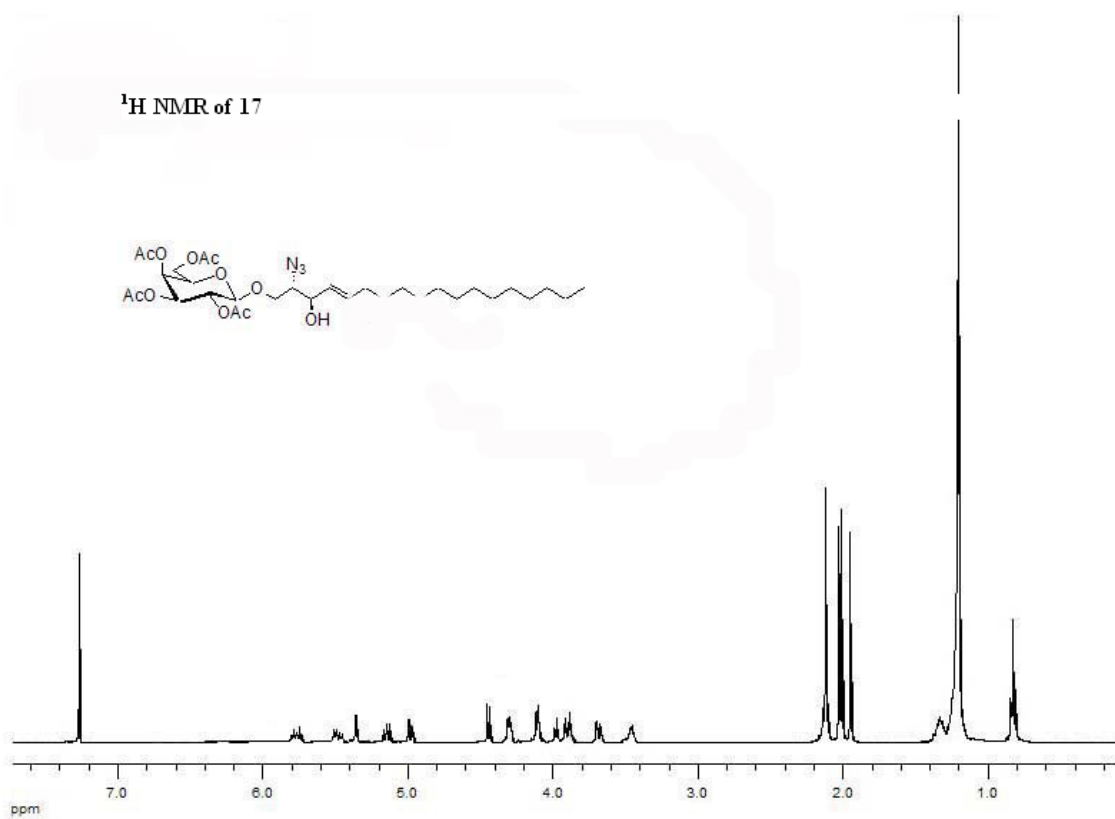

<sup>13</sup>C NMR of 17

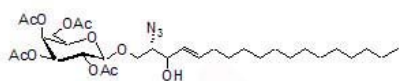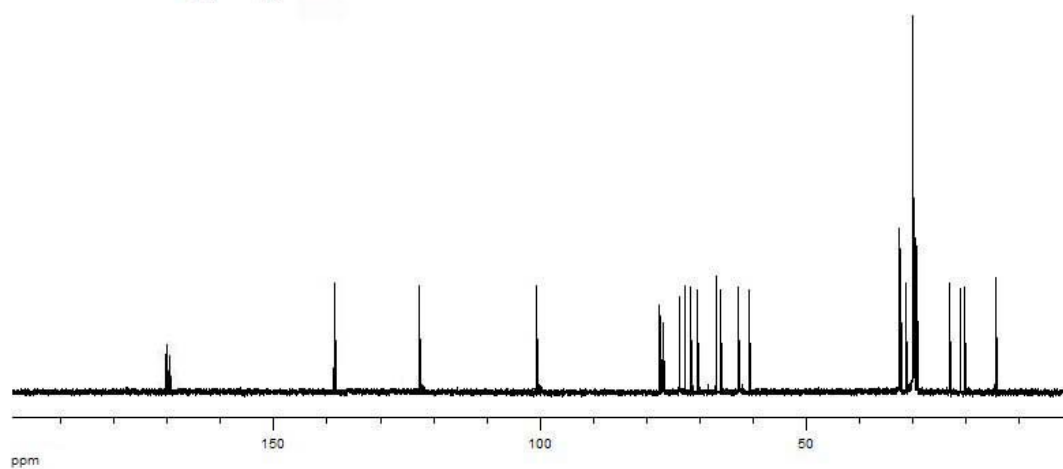

<sup>1</sup>H NMR of 18

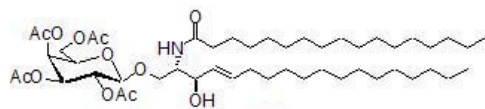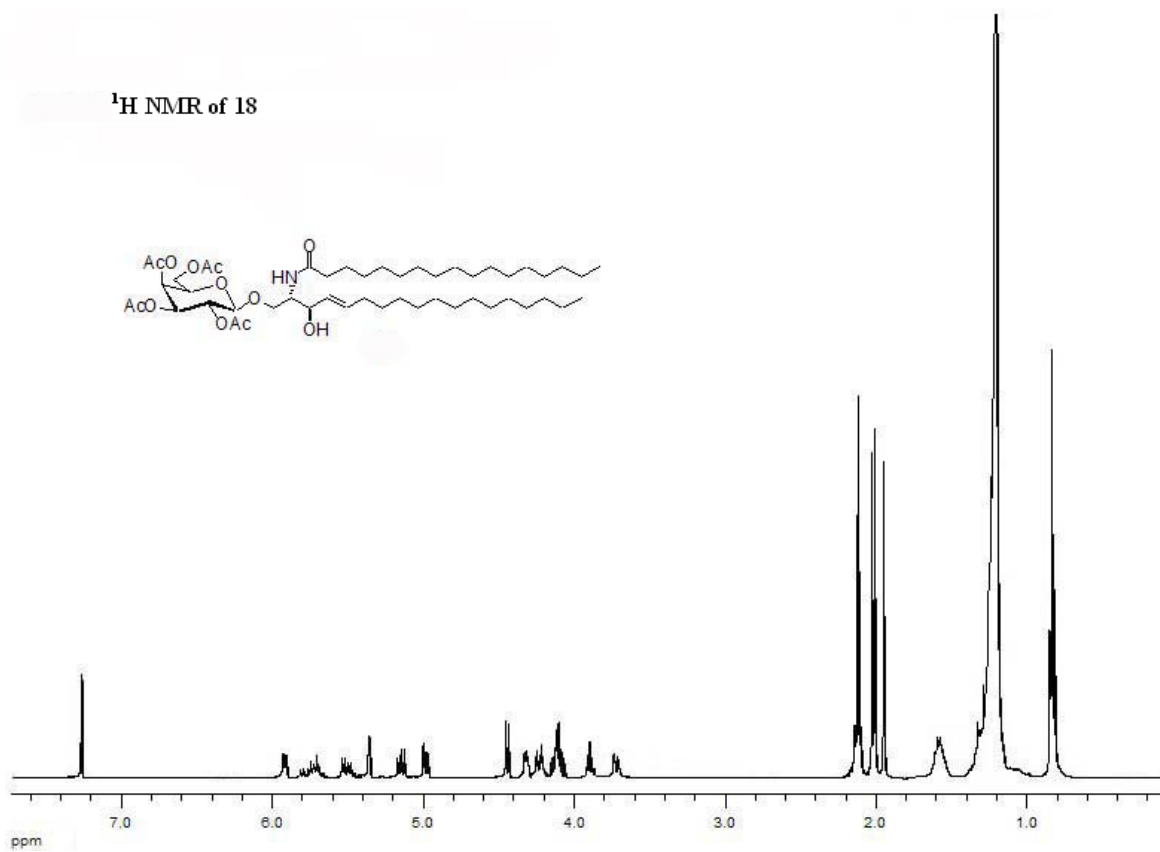

<sup>13</sup>C NMR of 18

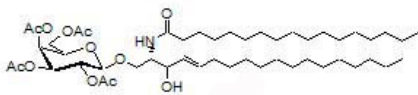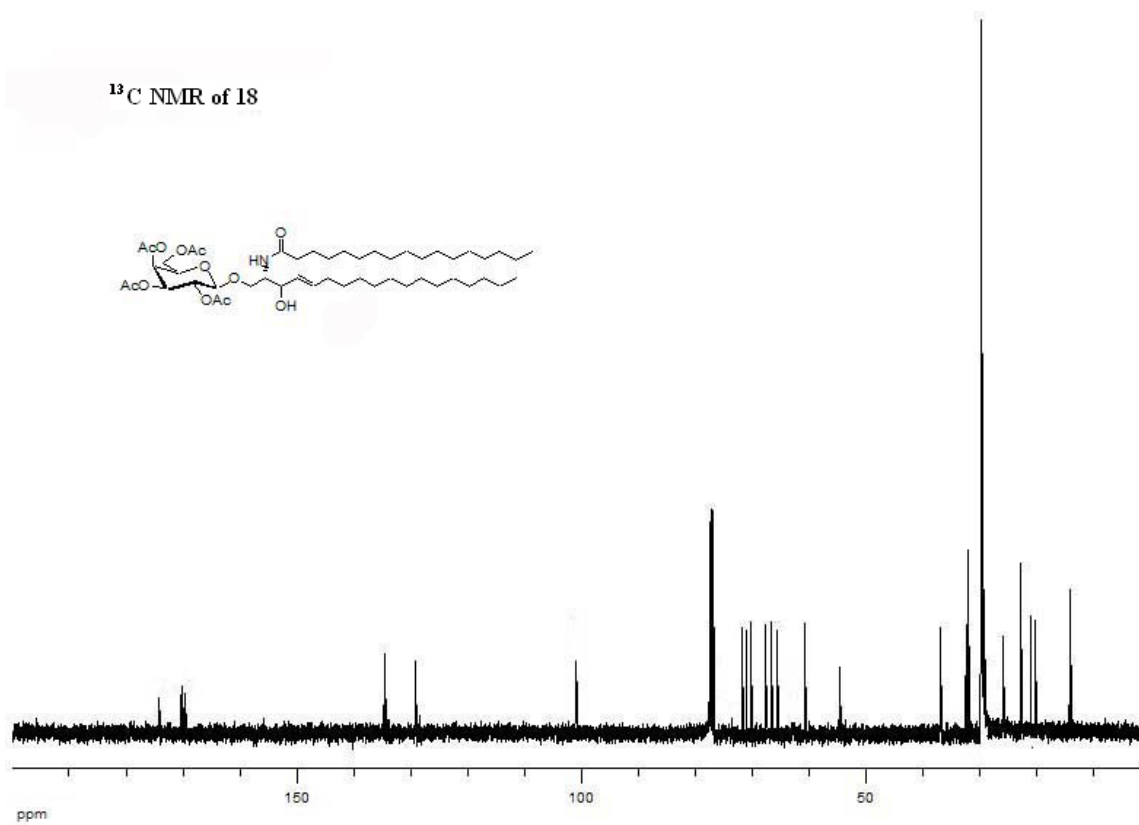

Supplement: b809570a.pdf [file b809570a.pdf]
